# Supplementary material for: A fluorescence “turn-on” probe for the respective ratiometric detection of hypochlorite and cysteine
Source: Royal Society of Chemistry journal article supplement (doi:10.1039/d3sd00051f), 2023-01-01
Supplement: d3sd00051f1.pdf [file d3sd00051f1.pdf]

## **A fluorescence “turn-on” probe for respective ratiometric detection of hypochlorite and cysteine**

Zhizhen Wu<sup>1</sup>, Muzi Cai<sup>1</sup>, Wenjuan Lv<sup>1</sup>, Cancan Lu<sup>1</sup>, Bingyan Wu<sup>1</sup>, Cuiling Ren<sup>\*, 1</sup>,  
Yalei Dong<sup>\*, 2</sup>, Hongli Chen<sup>1</sup>, Xingguo Chen<sup>1</sup>

1. State Key Laboratory of Applied Organic Chemistry, College of Chemistry and Chemical Engineering, Lanzhou University, Lanzhou 730000, P. R. China.

2. National Institutes for Food and Drug Control/NMPA Key Laboratory for Researching and Evaluation of Cosmetics, Beijing 100050, China.

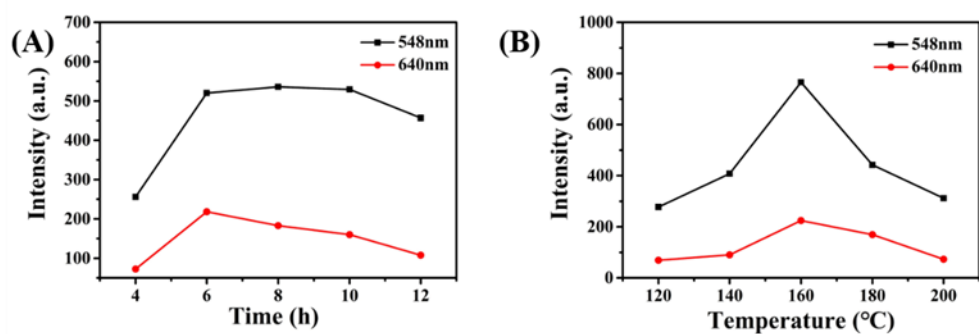

Figure S1 Normalized fluorescence intensity of N-CDs prepared under different reaction time (A) and temperature (B).

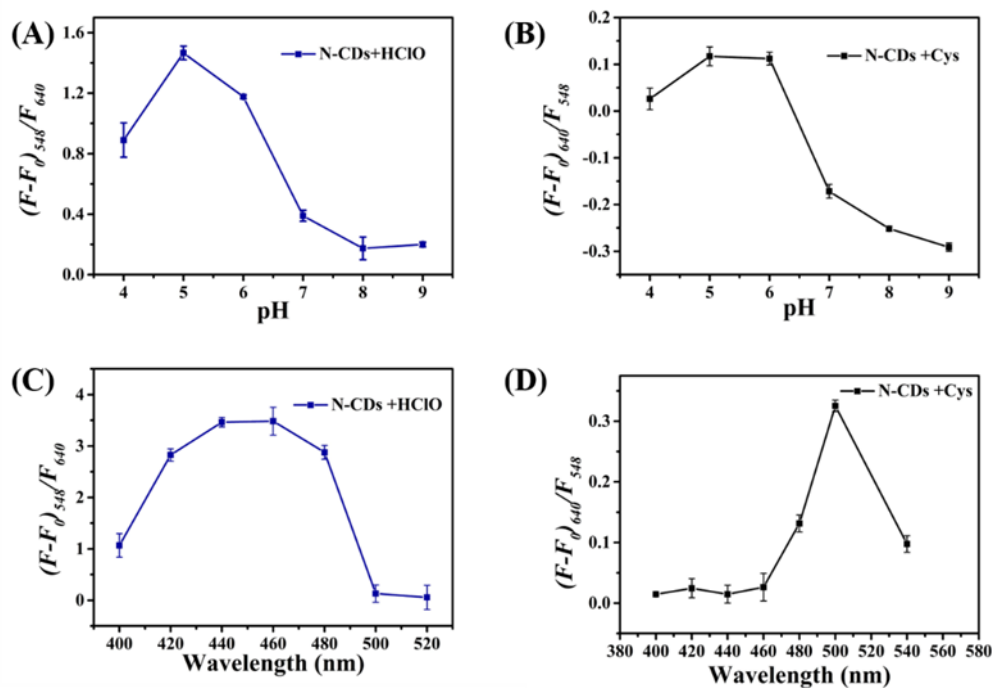

Figure S2 Fluorescence enhancement efficiency of HClO (A) and Cys (B) on N-CDs under different pH conditions and fluorescence enhancement efficiency of HClO (C) and Cys (D) on N-CDs under different excitation wavelengths.



Figure S3 High resolution XPS spectra of (A) C1s, (B) N1s and (C) O1s of N-CDs.

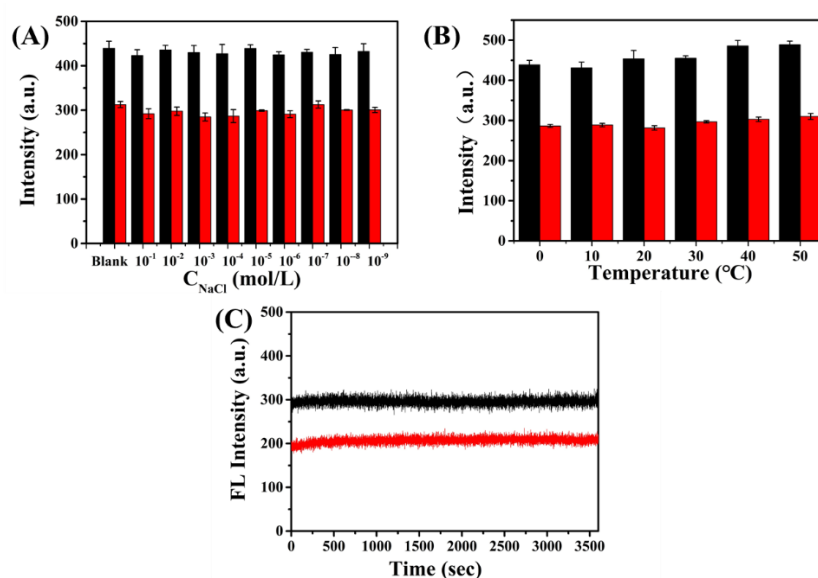

Figure S4 FL intensity variation of the N-CDs as a function of (A) concentration of NaCl; (B) Temperature; (C) Irradiation time (black signal corresponding to  $\lambda_{em} = 548$  nm, red signal corresponding to  $\lambda_{em} = 640$  nm)

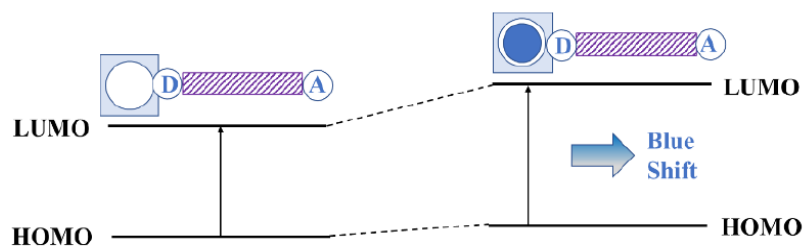

Figure S5 Schematic diagram of fluorescent ICT mechanism recognition process.

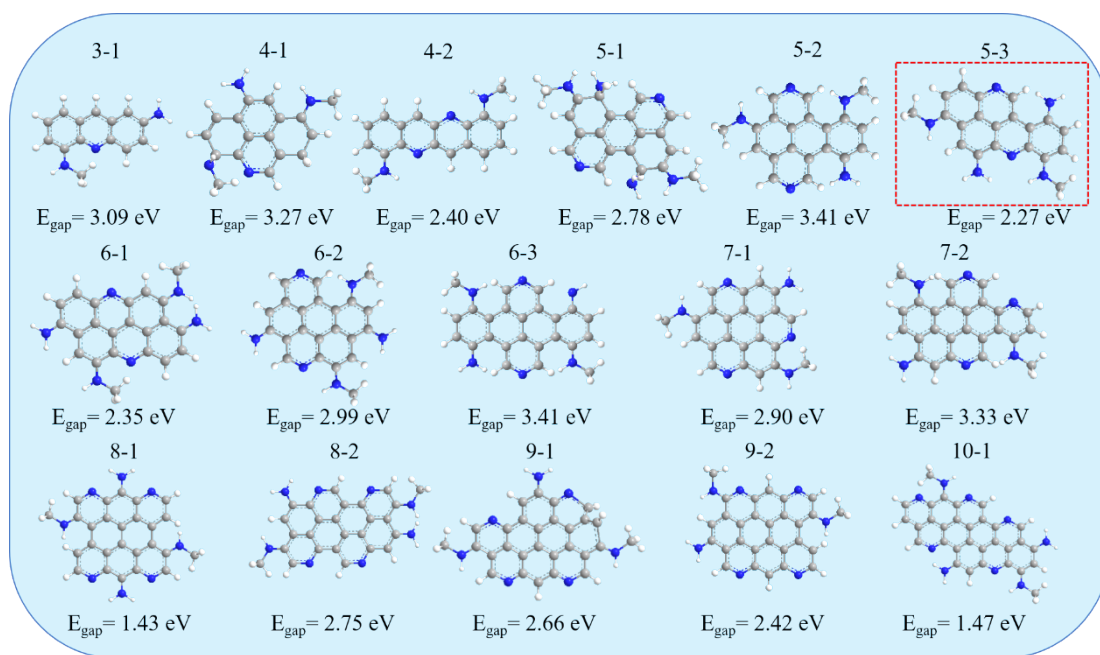

Figure S6 Density functional theory calculations related to molecular structure of N-CDs and optimized structures ranging from 3 to 10 polyaromatic rings.



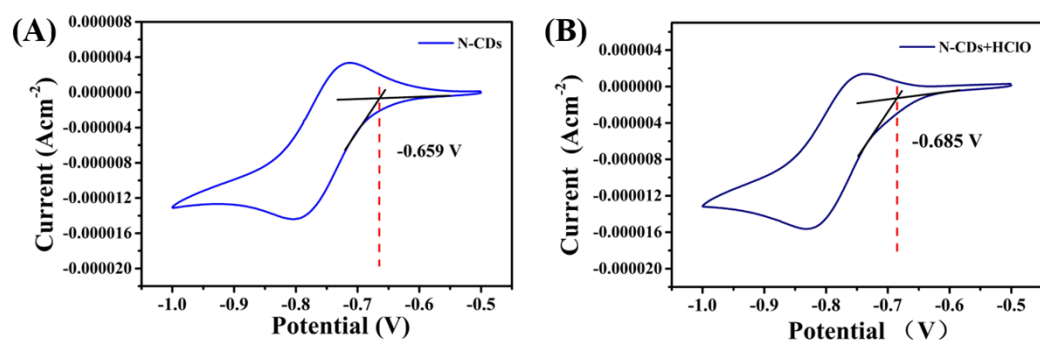

Figure S7 (A) Cyclic voltammograms of N-CDs (solvent: newly dried N, N-dimethylformamide); (B) The cyclic voltammetry of N-CDs after the addition of HClO (solvent: newly dried N, N-dimethylformamide)

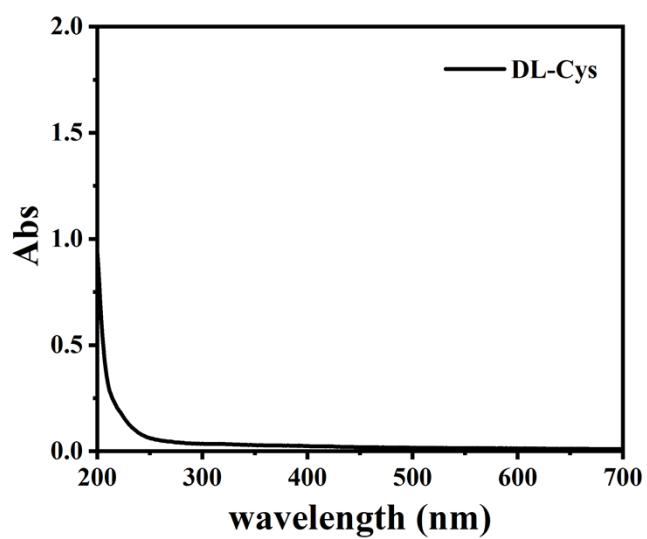

Figure S8 UV-Vis spectrum of Cys.

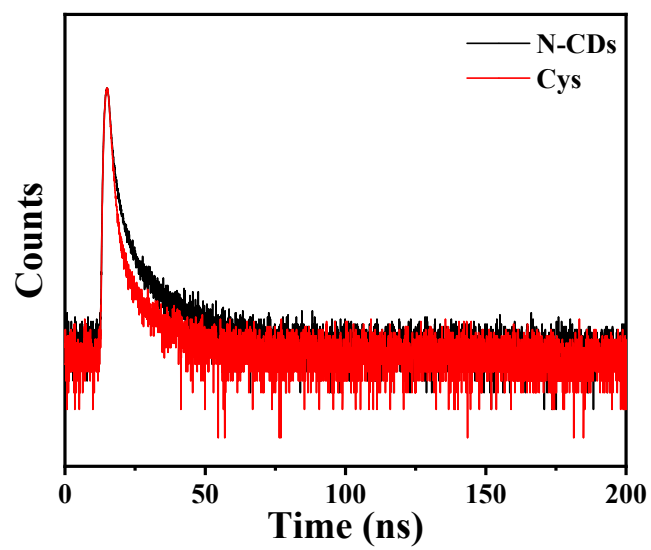

Figure S9 Fluorescence decay curve of N-CDs before (black line) and after the addition of Cys (red line)



Table 1 Detection results of HClO in serum samples by N-CDs.

| Sample | Added Amount ( $\mu\text{M}$ ) | Found Amount ( $\mu\text{M}$ ) | Average Recovery (% , n=3) | RSD (% , n=3) |
|--------|--------------------------------|--------------------------------|----------------------------|---------------|
| Serum  | 0.00                           | 0.00                           | -                          | -             |
|        | 180                            | 186.75                         | 103.75                     | 2.59          |
|        | 360                            | 357.12                         | 99.20                      | 0.85          |
|        | 720                            | 720.14                         | 100.01                     | 0.31          |

Table 2 Detection results of Cys in serum samples by N-CDs.

| Sample | Added Amount ( $\mu\text{M}$ ) | Found Amount ( $\mu\text{M}$ ) | Average Recovery (% , n=3) | RSD (% , n=3) |
|--------|--------------------------------|--------------------------------|----------------------------|---------------|
| Serum  | 0.00                           | 0.00                           | -                          | -             |
|        | 180                            | 184.86                         | 102.70                     | 2.12          |
|        | 360                            | 363.65                         | 101.01                     | 1.46          |
|        | 720                            | 717.12                         | 99.60                      | 1.85          |
